# Supplementary material
Source: publisher figshare collection journal article supplement (https://karger.figshare.com/ndownloader/files/33164810)
Supplement: Supplementary file 1 [file 33164810]

| Table S1 Search strategy of Pubmed | |
| --- | --- |
| Search query | |
| #1 | (Renal Insufficiency, Chronic)[MeSH Terms] |
| #2 | (Chronic Renal Insufficiencies[Title/Abstract])) OR (Renal Insufficiency, Chronic[Title/Abstract])) OR (Renal Insufficiencies, Chronic[Title/Abstract])) OR (Chronic Renal Insufficiency[Title/Abstract])) OR (Kidney Insufficiency, Chronic[Title/Abstract])) OR (Chronic Kidney Insufficiency[Title/Abstract])) OR (Chronic Kidney Insufficiencies[Title/Abstract])) OR (Kidney Insufficiencies, Chronic[Title/Abstract])) OR (Chronic Kidney Diseases[Title/Abstract])) OR (Chronic Kidney Disease[Title/Abstract])) OR (Disease, Chronic Kidney[Title/Abstract])) OR (Diseases, Chronic Kidney[Title/Abstract])) OR (Kidney Disease, Chronic[Title/Abstract])) OR (Kidney Diseases, Chronic[Title/Abstract])) OR (Chronic Renal Diseases[Title/Abstract])) OR (Chronic Renal Disease[Title/Abstract])) OR (Disease, Chronic Renal[Title/Abstract])) OR (Diseases, Chronic Renal[Title/Abstract])) OR (Renal Disease, Chronic[Title/Abstract])) OR (Renal Diseases, Chronic[Title/Abstract]) |
| #3 | #1 OR #2 |
| #4 | "BAY 94-8862" [Supplementary Concept] |
| #5 | ((BAY 94-8862[Title/Abstract]) OR (finerenone[Title/Abstract])) |
| #6 | #4 OR #5 |
| #7 | #3 AND #6 |
